# Supplementary material for: Salmo semae, a new species of trout, from the Göksu River, a drainage of Mediterranean Sea, Türkiye (Salmoniformes: Salmonidae)
Source: Research Square preprint supplement (doi:10.21203/rs.3.rs-8173295/v1), 2025-12-10
Supplement: Supplementary file 1 [file 3a35f89309785cbb8dd2d7ff.xlsx]

## Sheet: Sayfa1
Table S1. The interspecific p-distance values for the Salmo species.
Species	S. semae	S. labecula	S. ekmekciae	S. platycephalus	S. kottelati	S. chilo	S. munzuricus	S. baliki	S. okumusi	S. opimus	S. marmoratus	S. tigridis	S. fahrettini	S. abanticus	S. coruhensis	S. rizeensis	S. euphrataeus	S. duhani	S. murathani	S. brunoi	S. trutta	S. araxensis	S. ardahanensis
Salmo semae
Salmo labecula	0.00201613
Salmo ekmekciae	0.00302419	0.00302419
Salmo platycephalus	0.00302419	0.00100806	0.00403226
Salmo kottelati	0.00403226	0.00201613	0.00100806	0.00302419
Salmo chilo	0.00403226	0.00201613	0.00100806	0.00302419	0
Salmo munzuricus	0.00604839	0.00403226	0.00302419	0.00504032	0.00201613	0.00201613
Salmo baliki	0.00705645	0.00504032	0.00403226	0.00604839	0.00302419	0.00302419	0.00100806
Salmo okumusi	0.00806452	0.00604839	0.00504032	0.00705645	0.00403226	0.00403226	0.00201613	0.00302419
Salmo opimus	0.00907258	0.00705645	0.00604839	0.00806452	0.00504032	0.00504032	0.00705645	0.00806452	0.00907258
Salmo marmoratus	0.00907258	0.00705645	0.00604839	0.00806452	0.00504032	0.00504032	0.00705645	0.00806452	0.00907258	0
Salmo tigridis	0.00907258	0.00907258	0.0100806	0.0100806	0.0110887	0.0110887	0.0131048	0.0141129	0.015121	0.0110887	0.0110887
Salmo fahrettini	0.0120968	0.0100806	0.00907258	0.0110887	0.00806452	0.00806452	0.00806452	0.00907258	0.0100806	0.00705645	0.00705645	0.0141129
Salmo abanticus	0.0120968	0.0100806	0.00907258	0.0110887	0.00806452	0.00806452	0.00806452	0.00907258	0.0100806	0.00705645	0.00705645	0.0141129	0
Salmo coruhensis	0.0120968	0.0100806	0.00907258	0.0110887	0.00806452	0.00806452	0.0100806	0.0110887	0.0120968	0.00705645	0.00705645	0.0141129	0.00201613	0.00201613
Salmo rizeensis	0.0120968	0.0100806	0.00907258	0.0110887	0.00806452	0.00806452	0.0100806	0.0110887	0.0120968	0.00705645	0.00705645	0.0141129	0.00201613	0.00201613	0.00201613
Salmo euphrataeus	0.0131048	0.0110887	0.0100806	0.0120968	0.00907258	0.00907258	0.0110887	0.0120968	0.0131048	0.00806452	0.00806452	0.015121	0.00302419	0.00302419	0.00302419	0.00302419
Salmo duhani	0.0131048	0.0110887	0.0100806	0.0120968	0.00907258	0.00907258	0.00907258	0.0100806	0.0110887	0.00806452	0.00806452	0.015121	0.00100806	0.00100806	0.00302419	0.00302419	0.00403226
Salmo murathani	0.0131048	0.0110887	0.0100806	0.0120968	0.00907258	0.00907258	0.0110887	0.0120968	0.0131048	0.00806452	0.00806452	0.015121	0.00302419	0.00302419	0.00302419	0.00302419	0	0.00403226
Salmo brunoi	0.0131048	0.0110887	0.0100806	0.0120968	0.00907258	0.00907258	0.00907258	0.0100806	0.0110887	0.00806452	0.00806452	0.015121	0.00100806	0.00100806	0.00302419	0.00302419	0.00403226	0	0.00403226
Salmo trutta	0.0136089	0.0115927	0.0126008	0.0126008	0.0115927	0.0115927	0.0136089	0.0146169	0.015625	0.0105847	0.0105847	0.0146169	0.0136089	0.0136089	0.0115927	0.0136089	0.0146169	0.0146169	0.0146169	0.0146169
Salmo araxensis	0.0141129	0.0120968	0.0110887	0.0131048	0.0100806	0.0100806	0.0120968	0.0131048	0.0120968	0.00907258	0.00907258	0.016129	0.00403226	0.00403226	0.00403226	0.00403226	0.00100806	0.00504032	0.00100806	0.00504032	0.015625
Salmo ardahanensis	0.0141129	0.0120968	0.0110887	0.0131048	0.0100806	0.0100806	0.0120968	0.0131048	0.0141129	0.00907258	0.00907258	0.016129	0.00403226	0.00403226	0.00403226	0.00403226	0.00100806	0.00504032	0.00100806	0.00504032	0.015625	0.00201613
